# Supplementary material for: The mesoscale organization of syntaxin 1A and SNAP25 is determined by SNARE–SNARE interactions
Source: eLife. 2021 Nov 15;10:e69236. doi: 10.7554/eLife.69236 (PMC8629428; doi:10.7554/eLife.69236)
Supplement: Source data 1. [file elife-69236-supp1.xlsx]

## Sheet: Tabelle1
	Corresponding p-values
	Figure 1	control vs GFP-SNAP25	control vs GFP-SNAP25 /Stx-full	control vs GFP-SNAP25 /Stx-deltaS
	1B	0.560357	0.719541	0.906462
	1C	0.0787344	0.323417	0.298777
	1E	0.698029	0.427963	0.474237
	1F	0.263623	0.294867	0.222599
	Figure 1-Suppl. 2	control vs Stx-full	control vs Stx-deltaS	Stx-full vs Stx-delta
	1C	0.224585	0.83593	0.226782
	Figure 2-Suppl. 2 fluorescence intensities	GFP: control vs Stx-full	GFP: control vs Stx-deltaS	GFP: Stx-full vs Stx-deltaS	ATTO647: control vs Stx-full	ATTO647: control vs Stx-deltaS	ATTO647: Stx-full vs Stx-deltaS
		0.369001	0.901667	0.322218	0.0899865	0.476168	0.0713616
	Figure 2-Suppl. 2 PCC + flipped	flipped ctrl vs ctrl	Stx-full vs ctrl	Stx-full vs flipped	Stx-deltaS vs ctrl	Stx-deltaS vs flipped	Stx-full vs Stx-deltaS
		0.000157773	0.133298	1.72191e-05	0.410542	8.179e-07	0.0094661
	Figure 3	deltaS vs full
		0.000165217
	Figure 4	ROI Intensity			Spot size / rSDM			Spots per 1µm2
		control vs Stx-full	control vs Stx-deltaS	Stx-full vs Stx-delta	control vs Stx-full	control vs Stx-deltaS	Stx-full vs Stx-delta	control vs Stx-full	control vs Stx-deltaS	Stx-full vs Stx-delta
	4B	0.000385484	0.000349238	0.0647155	1.55445e-05	0.000585798	0.0989744	0.000676606	0.000504132	0.286983
	4C	0.0135656	0.0965459	0.0135656	0.00875154	0.28662	0.0327072	0.0125746	0.0742634	0.0347092
	Figure 4-Suppl. 5 PCC + flipped	flipped ctrl vs ctrl	Stx-full vs ctrl	Stx-full vs flipped	Stx-deltaS vs ctrl	Stx-deltaS vs flipped	Stx-delta vs Stx-full
		4.55262e-08	0.000911683	1.19055e-06	1.63762e-05	1.29974e-07	0.277245
	Figure 4-suppl.1 PSF	594: STED vs conf	647: STED vs conf
		0.00750715	0.000698735
	Figure 4-suppl. 7 spectral properties	ROI Intensity			Spot size / rSDM			Spots per 1µm2
		control vs Stx-full	control vs Stx-deltaS	Stx-full vs Stx-delta	control vs Stx-full	control vs Stx-deltaS	Stx-full vs Stx-delta	control vs Stx-full	control vs Stx-deltaS	Stx-full vs Stx-delta
	B	0.0260152	0.0295111	0.033308	0.0357155	0.000746676	0.0987782	0.00991246	0.0129755	0.0916282
	C	0.0878224	0.753693	0.0410589	0.0804998	0.186327	0.186327	0.0599036	0.814962	0.0277477
	Figure 5	WT vs SNAP25-deltaC	WT vs SNAP25-deltaN	WT vs SNAP25-deltaN/C
	5B	0.239819	0.0399762	0.001729
	5D	0.066467	0.00338841	0.0327198
	Figure 5-Suppl. 1 PCC + flipped	flipped WT vs WT	deltaC vs WT	deltaC vs flipped	deltaN vs WT	deltaN vs flipped	deltaN/C vs WT	deltaN/C vs flipped
		4.00582e-06	0.239819	0.000263262	0.0399762	0.000821478	0.001729	1.74497e-05
	Figure 5-suppl.3 Munc18	ROI Intensity			Spot size / rSDM			Spots per 1µm2
		direct fix vs 0µM Munc	direct fix vs 6µM Munc	0µM vs 6µM Munc	direct fix vs 0µM Munc	direct fix vs 6µM Munc	0µM vs 6µM Munc	direct fix vs 0µM Munc	direct fix vs 6µM Munc	0µM vs 6µM Munc
	6B	0.335703	0.994606	0.0059871	0.554612	0.741388	0.145397	0.129616	0.152781	0.08553
	6C	0.285522	0.34897	0.619777	0.860738	0.173735	0.202016	0.341465	0.719442	0.567962
